# Supplementary material
Source: publisher figshare collection journal article supplement (https://springernature.figshare.com/ndownloader/files/13213901)

Supp. Figure 3

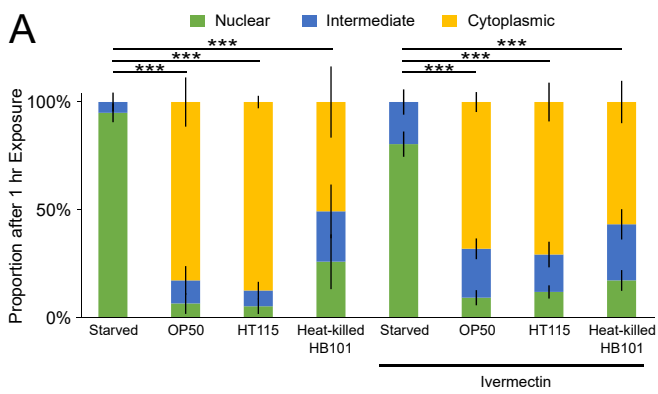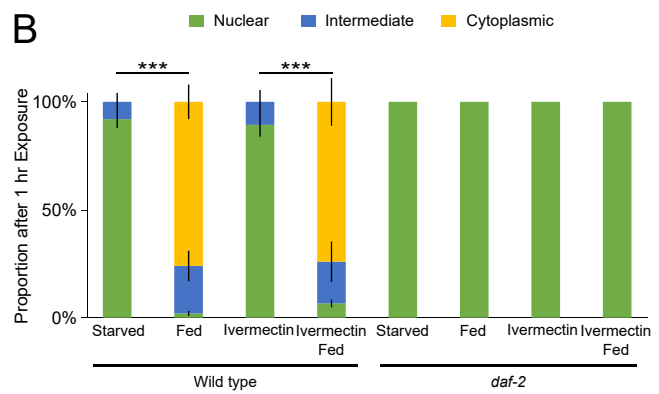

Supplement: Supplementary file [file 13213901]
